# Supplementary material for: Quantitative analysis of the cysteine redoxome by iodoacetyl tandem mass tags
Source: PubMed Central journal article supplement (PMC5427158; doi:10.1007/s00216-017-0326-6), 2017-04-07
Supplement: 216_2017_326_MOESM1_ESM.pdf [file 216_2017_326_MOESM1_ESM.pdf]

**Analytical and Bioanalytical Chemistry**

**Electronic Supplementary Material**

**Quantitative analysis of the cysteine redoxome by iodoacetyl tandem mass tags**

Shakir Shakir, Joelle Vinh, Giovanni Chiappetta

Additional files available under “Supplementary Material”.

## **Content**

### **ESM S1.....p. 3**

ESM S1 contains the results of the quantification accuracy tests. For each of the three tested standard proteins fragmentation profiles of cysteine containing peptides are shown, as well as a zoom on the reporter ion region to evidence the ratio of reporter ion 130/131. This supplementary material also shows the non-reducing SDS-PAGE separations performed on the three standard proteins as well as the quantification results obtained by ImageJ.

### **ESM S2.....p. 17**

ESM S2 contains two tables. Table S1 lists the significant changes in protein expression profiles in *E. Coli* cell cultures following the oxidizing treatment. Table S2 lists cysteine containing peptide sequences with significant changes in the oxidized fraction following the oxidizing treatment.

### **ESM S3 (see additional file)**

ESM S3 provides a complete list of proteins quantified in the H<sub>2</sub>O<sub>2</sub> treated cells vs. control cells.

### **ESM S4 (see additional file)**

ESM S4 provides a complete list of cysteine residues quantified in the H<sub>2</sub>O<sub>2</sub> treated cells vs. control cells.

# ESM S1

## Catalase OS=Bos taurus GN=CAT PE=1 SV=3 (P00432)

MS/MS Fragmentation of **DGPMCMMDNQGGAPNYYNPSFSAPEHQPSALEHR**

Found in **CATA\_BOVIN**, Catalase OS=Bos taurus GN=CAT PE=1 SV=3

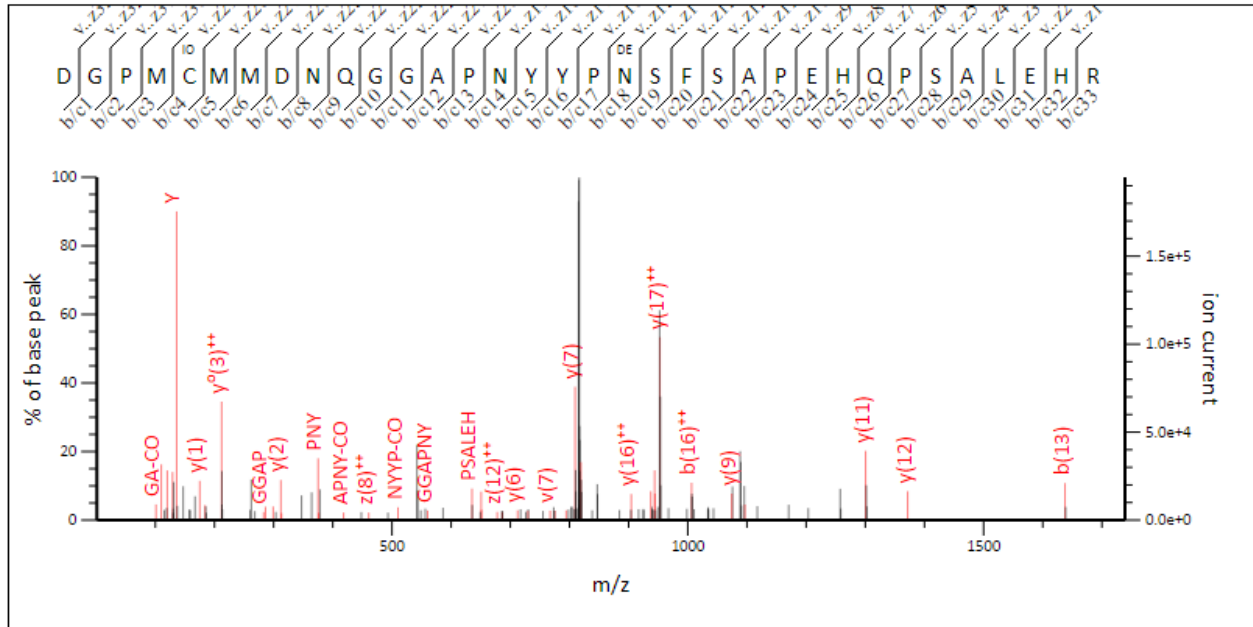

HF170126\_0111\_i\_ssh #26370 RT: 38.55 AV: 1 NL: 1.74E4  
 F: FTMS + p NSI Full ms2 816.3500@hcd28.00 [100.0000-4185.0000]

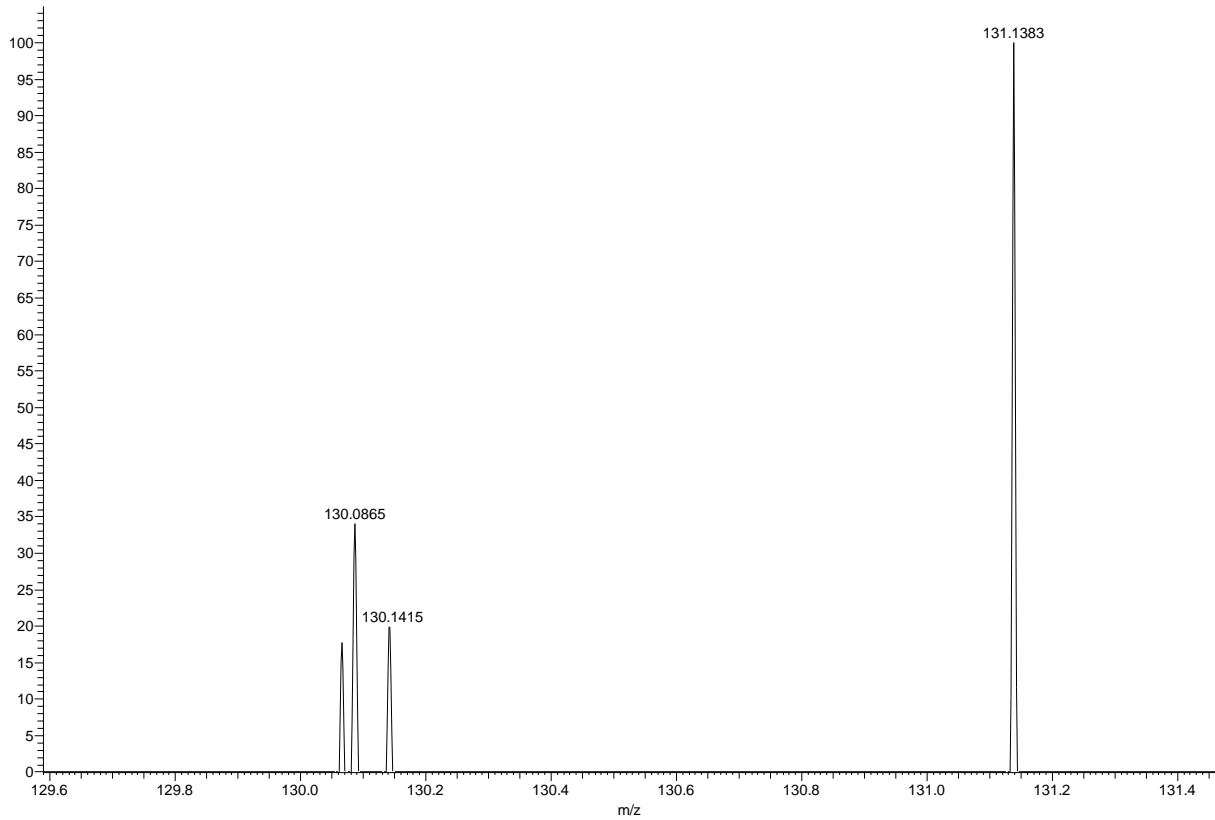

MS/MS Fragmentation of **LCENIAGHLK**  
 Found in **CATA\_BOVIN**, Catalase OS=Bos taurus GN=CAT PE=1 SV=3

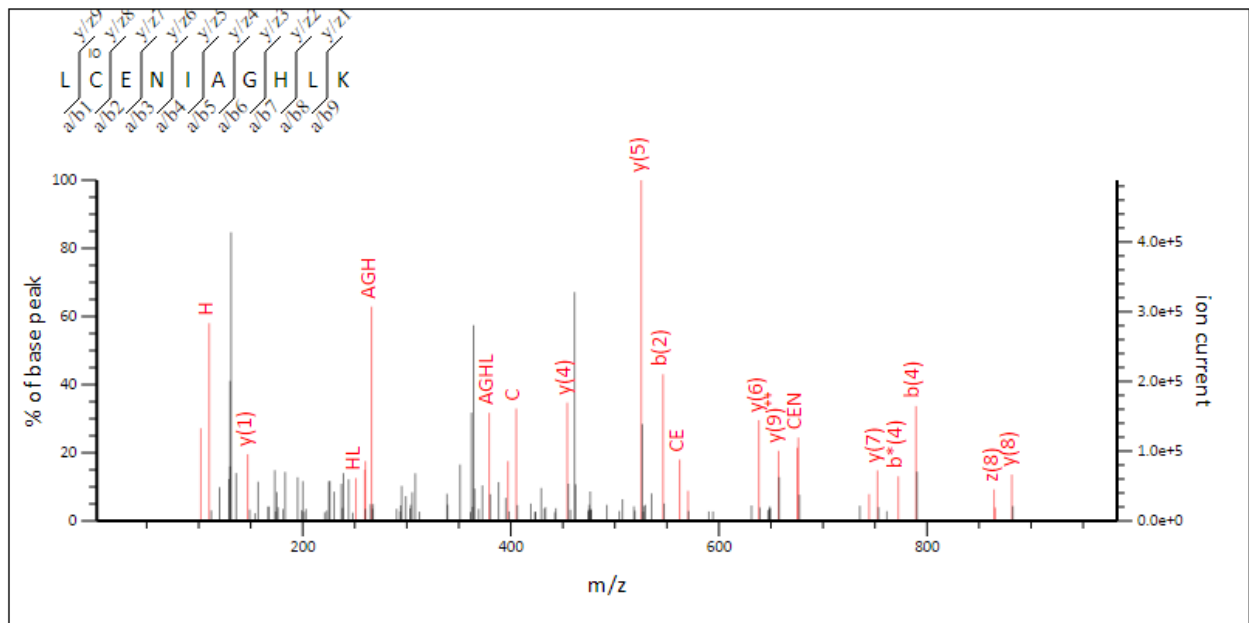

HF170126\_0111\_i\_ssh#15606 RT: 23.46 AV: 1 NL: 1.44E6  
F: FTMS + p NSI Full ms2 476.2728@hcd28.00 [100.0000-1480.0000]

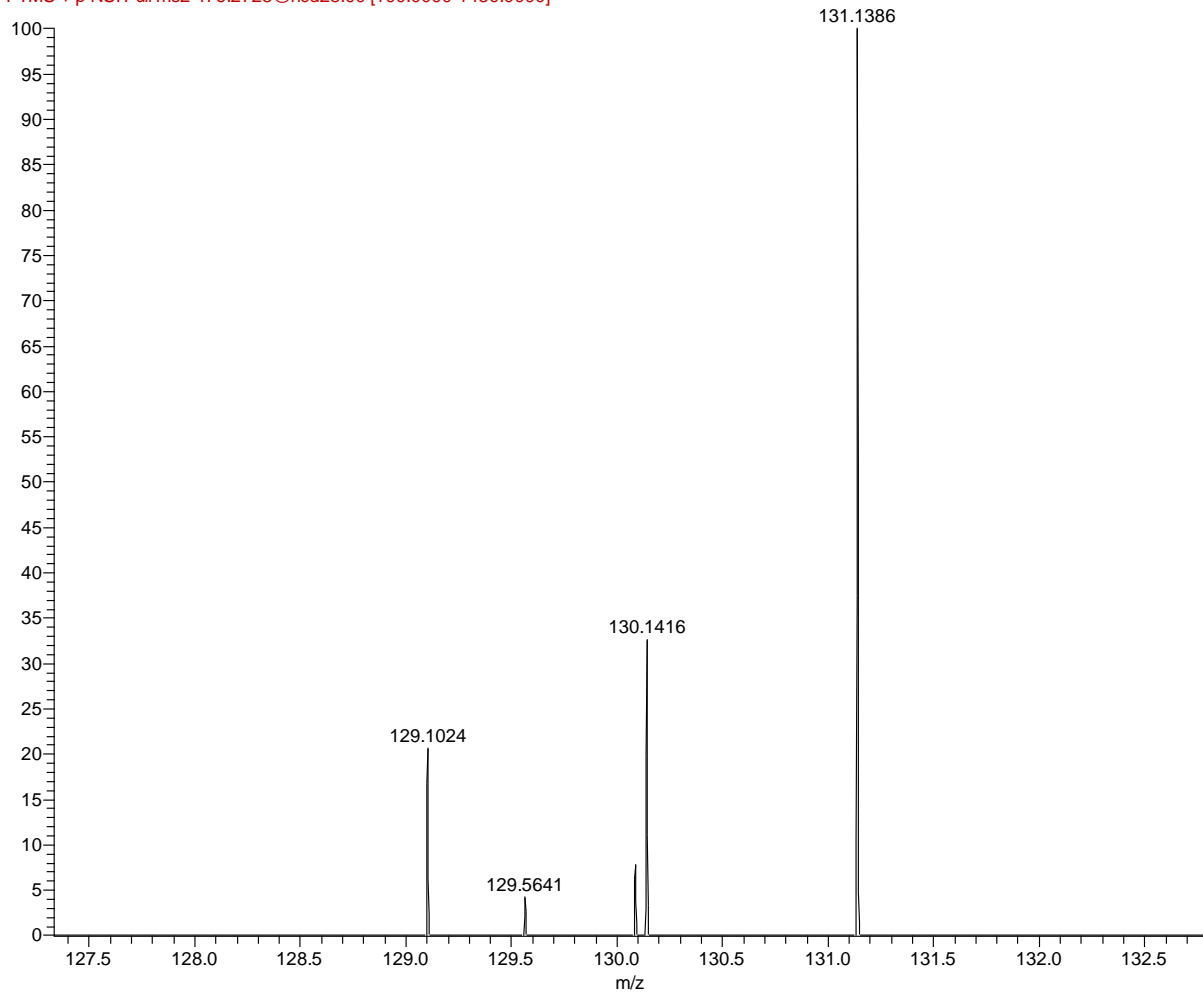

MS/MS Fragmentation of **LGPNYLQIPVNC**PYR  
Found in **CATA\_BOVIN**, Catalase OS=Bos taurus GN=CAT PE=1 SV=3

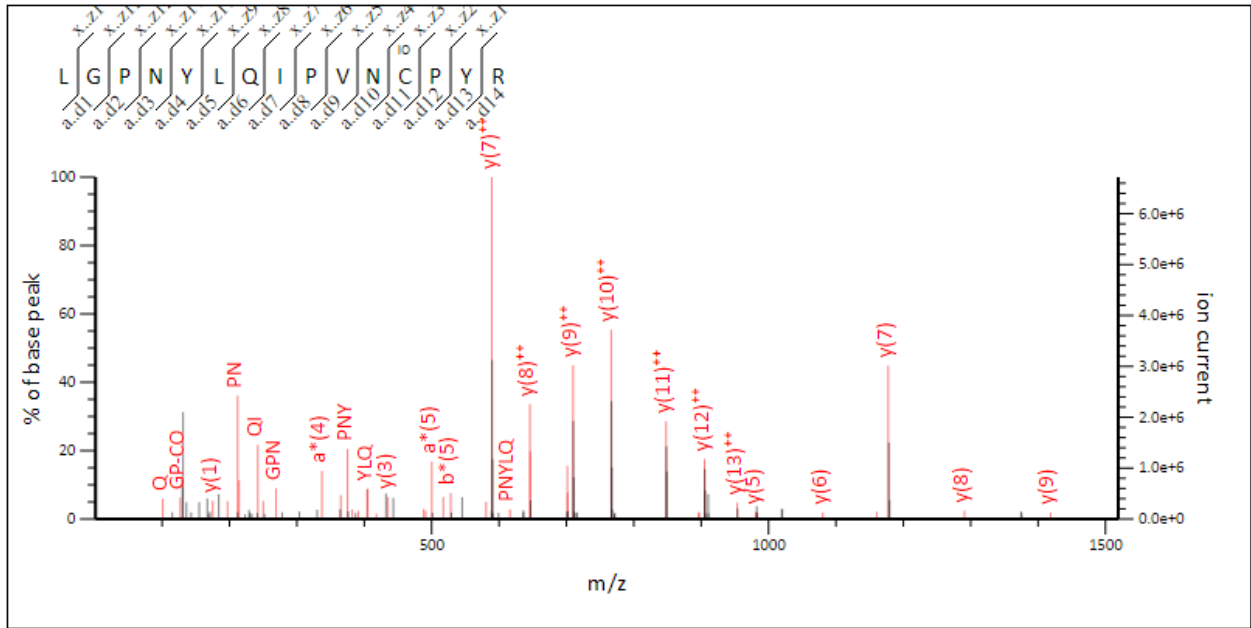

HF170126\_0112\_i\_ssh #28392-28608 RT: 41.23-41.49 AV: 10 NL: 1.37E6  
 F: FTMS + p NSI Full ms2 692.7136@hcd28.00 [100.0000-2140.0000]

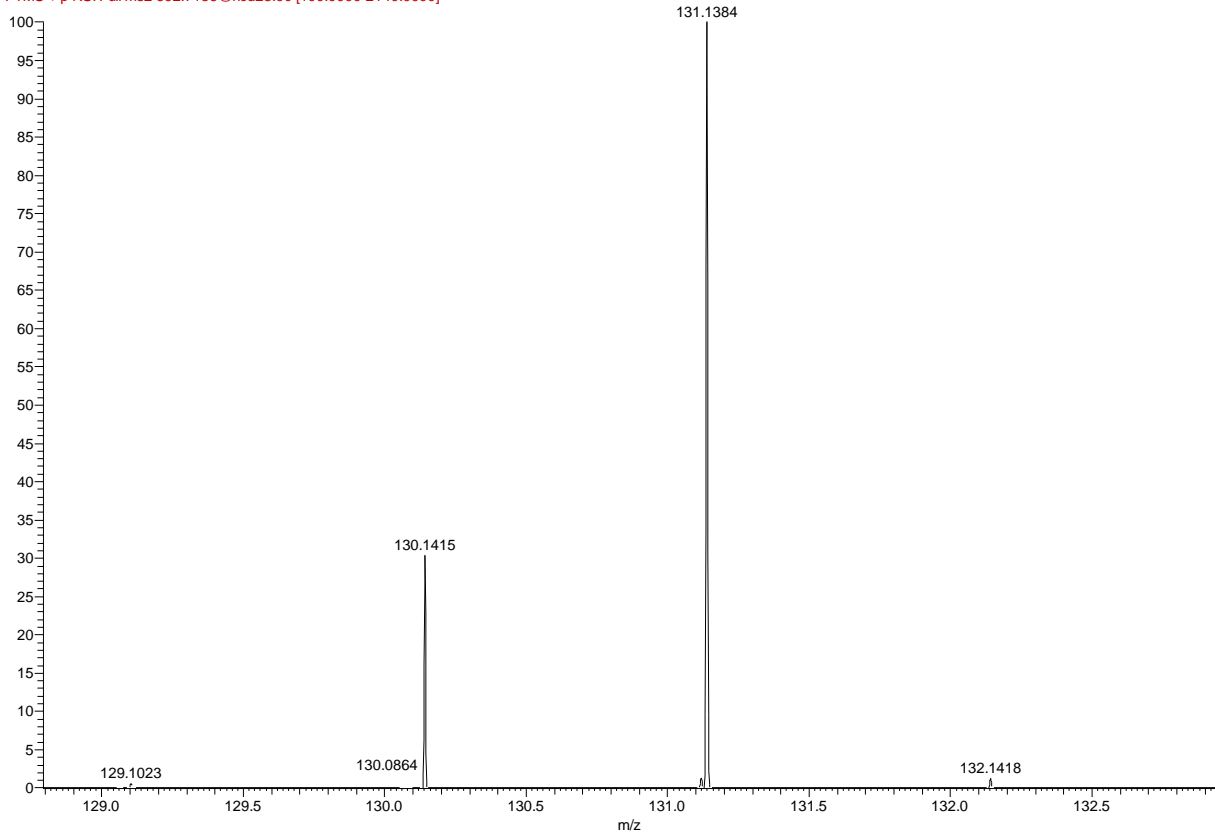

MS/MS Fragmentation of **LVNANGEAVYCK**  
 Found in **CATA\_BOVIN**, Catalase OS=Bos taurus GN=CAT PE=1 SV=3

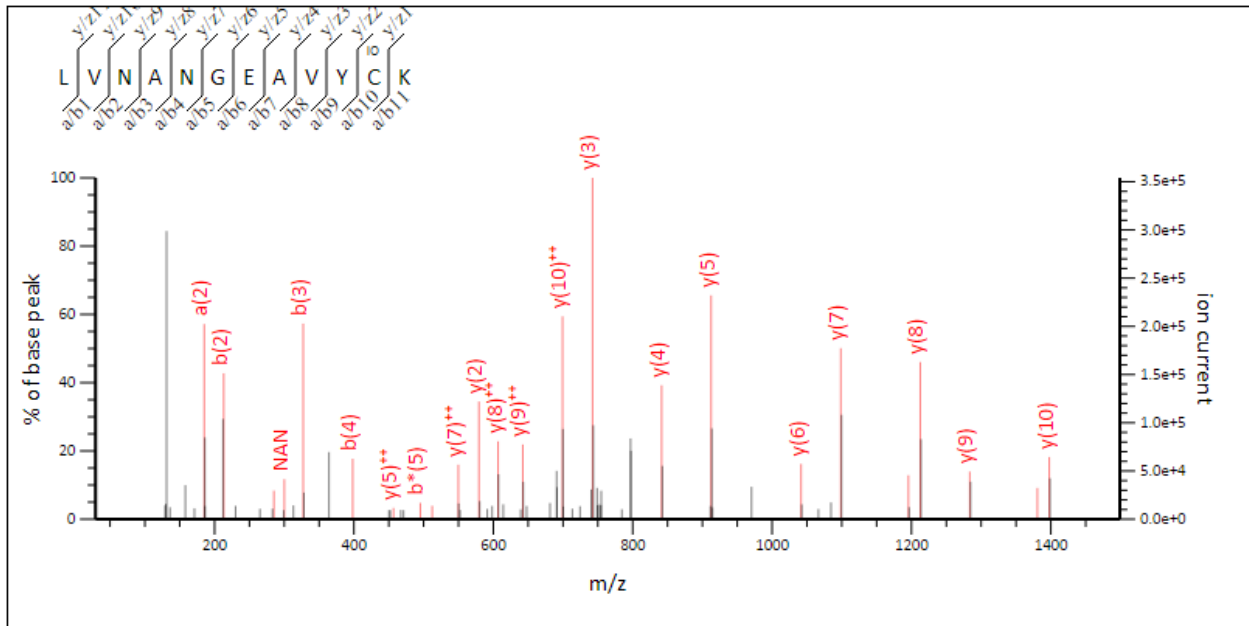

HF170126\_0112\_i\_ssh#16651-16814 RT: 24.92-25.13 AV: 8 NL: 1.04E5  
 F: FTMS + p NSI Full ms2 805.4321@hcd28.00 [100.0000-1665.0000]

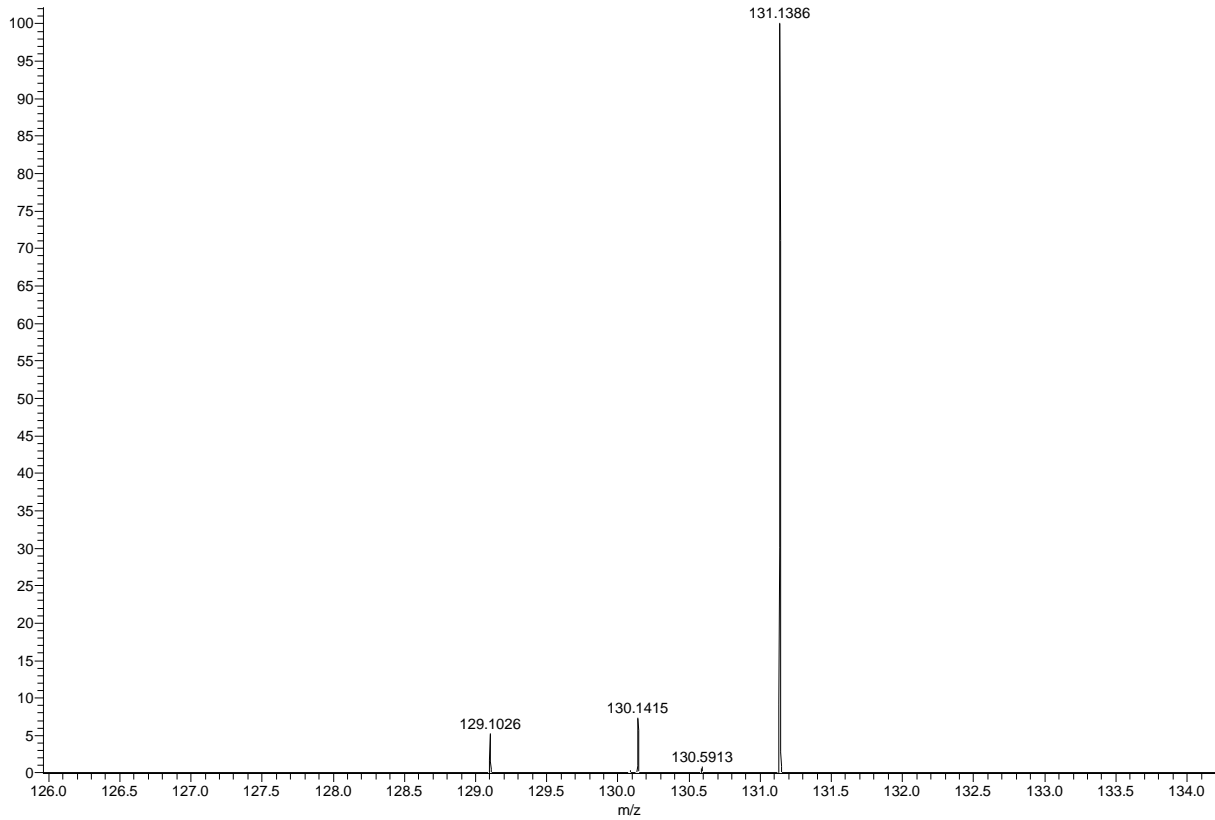

# Alkaline phosphatase OS=Escherichia coli (strain K12) GN=phoA PE=1 SV=1 (P00634)

MS/MS Fragmentation of **ATYHGNI D K P A V T C T P N P Q R**  
 Found in **PPB\_ECOLI**, Alkaline phosphatase OS=Escherichia coli (strain K12) GN=phoA PE=1 SV=1

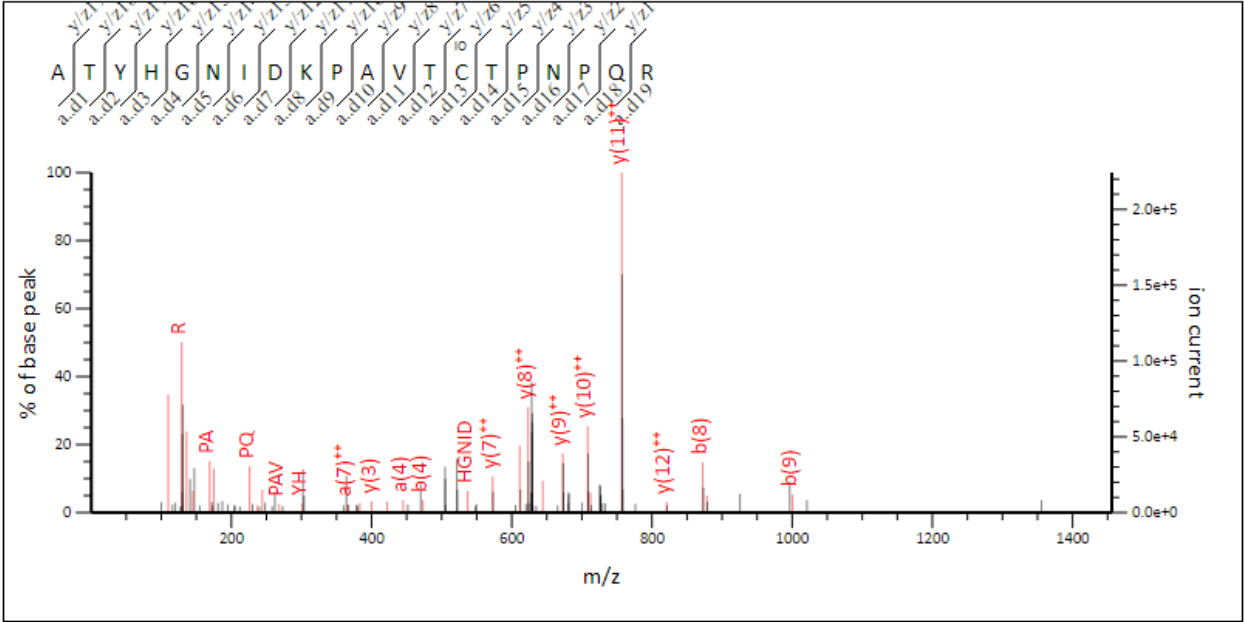



HF170126\_0111\_i\_ssh#14972 RT: 22.55 AV: 1 NL: 4.89E4  
F: FTMS + p NSI Full ms2 628.8287@hcd28.00 [100.0000-2585.0000]

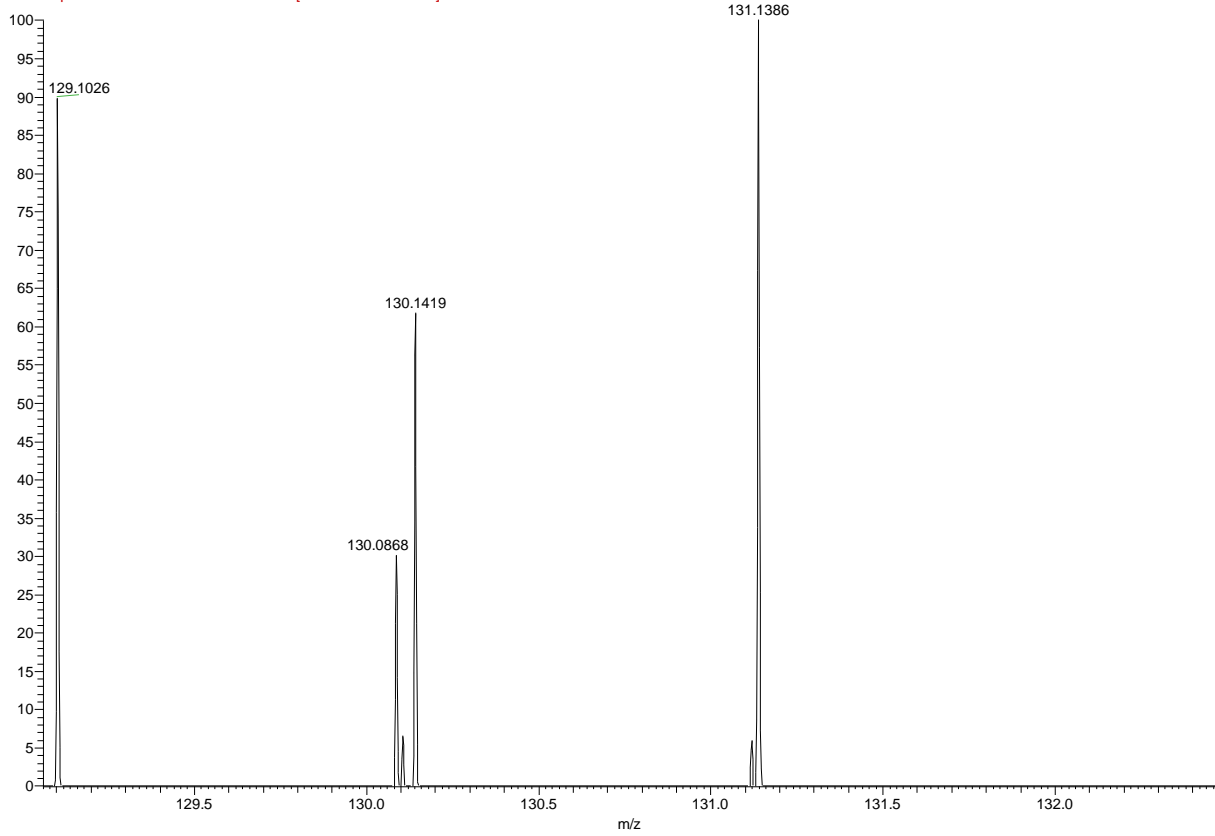

MS/MS Fragmentation of **CYGPSATSEK**

Found in **PPB\_ECOLI**, Alkaline phosphatase OS=Escherichia coli (strain K12) GN=phoA PE=1 SV=1

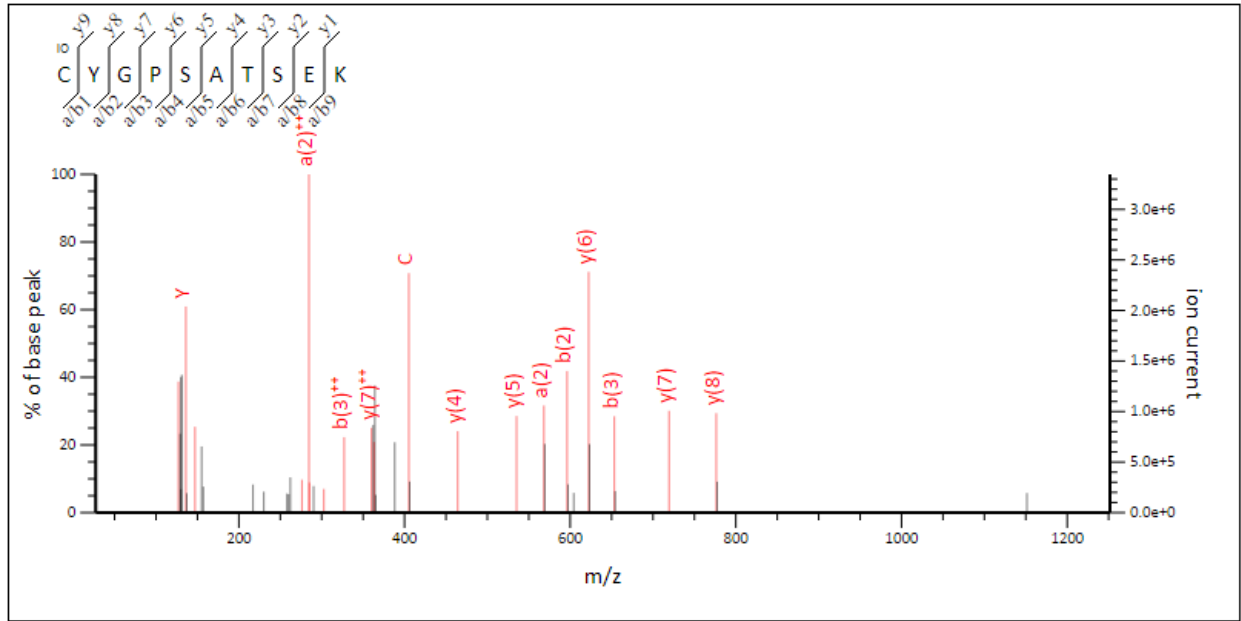

HF170126\_0111\_i\_ssh#12300 RT: 18.68 AV: 1 NL: 3.77E5  
 F: FTMS + p NSI Full ms2 387.5480@hcd28.00 [100.0000-1205.0000]

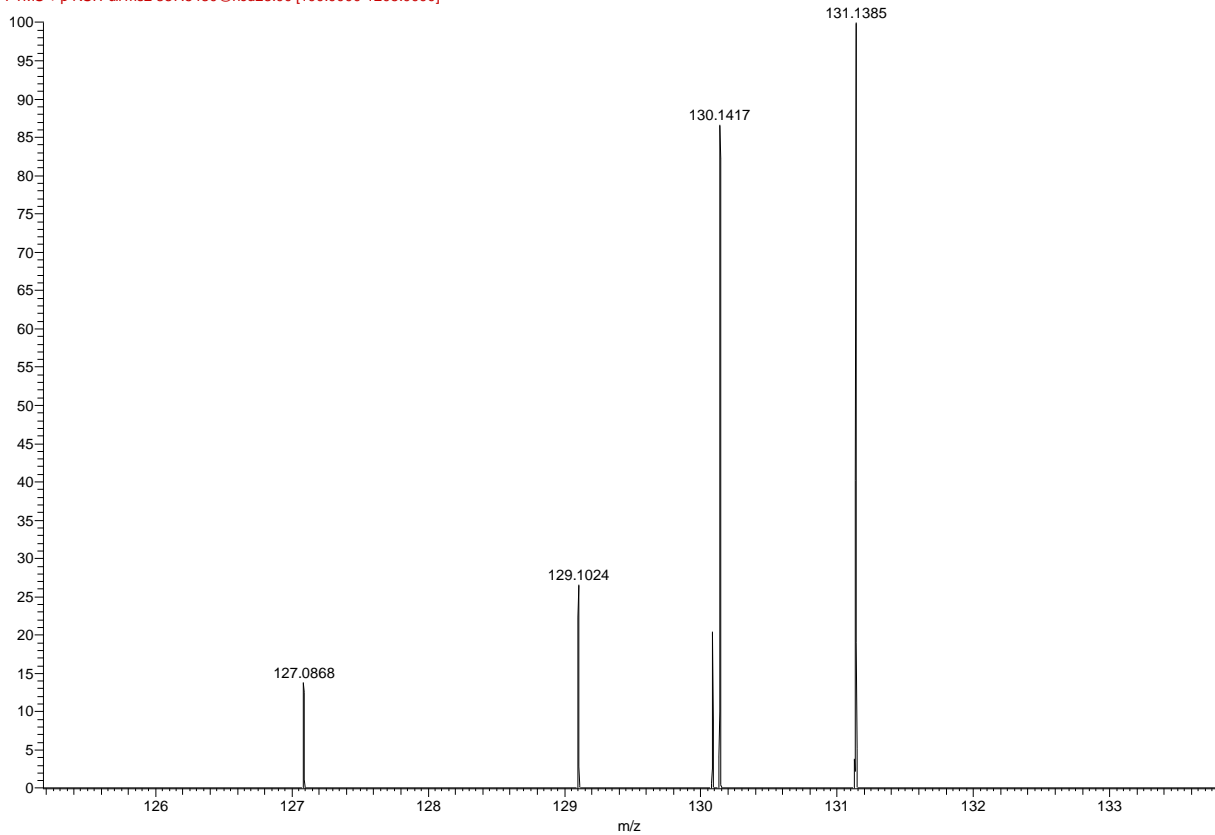

**MS/MS Fragmentation of CYGPSATSEK**

Found in **PPB\_ECOLI**, Alkaline phosphatase OS=Escherichia coli (strain K12) GN=phoA PE=1 SV=1

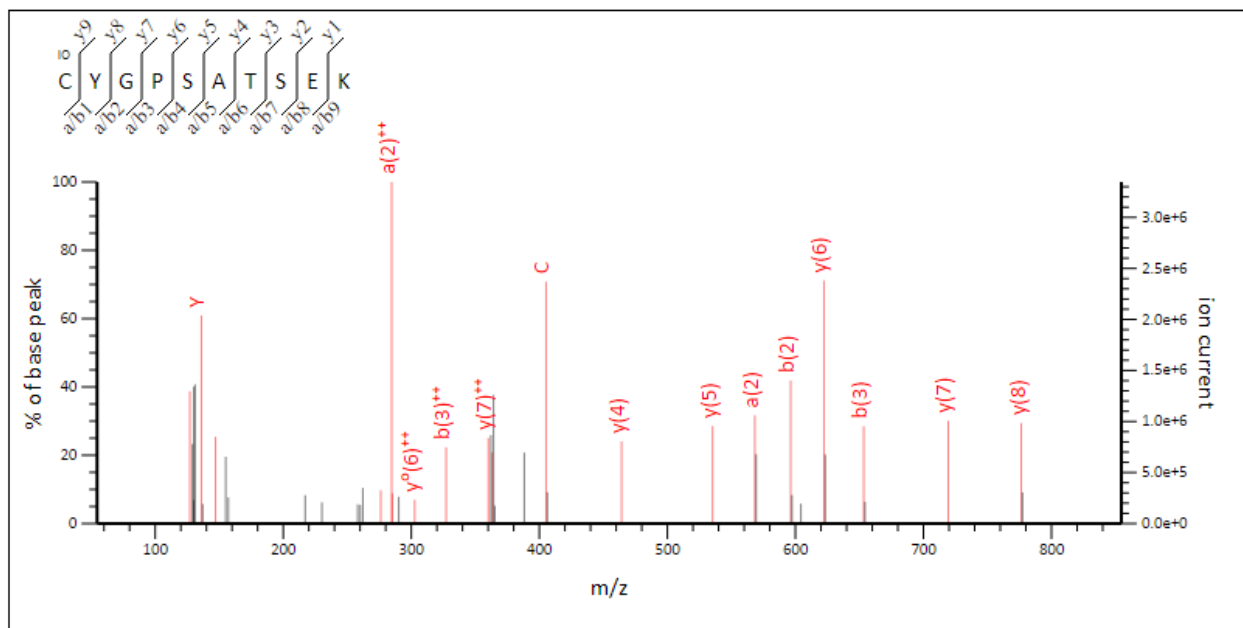

HF170126\_0111\_i\_ssh#12528 RT: 19.00 AV: 1 NL: 3.59E5  
 F: FTMS + p NSI Full ms2 457.8974@hcd28.00 [100.0000-1420.0000]

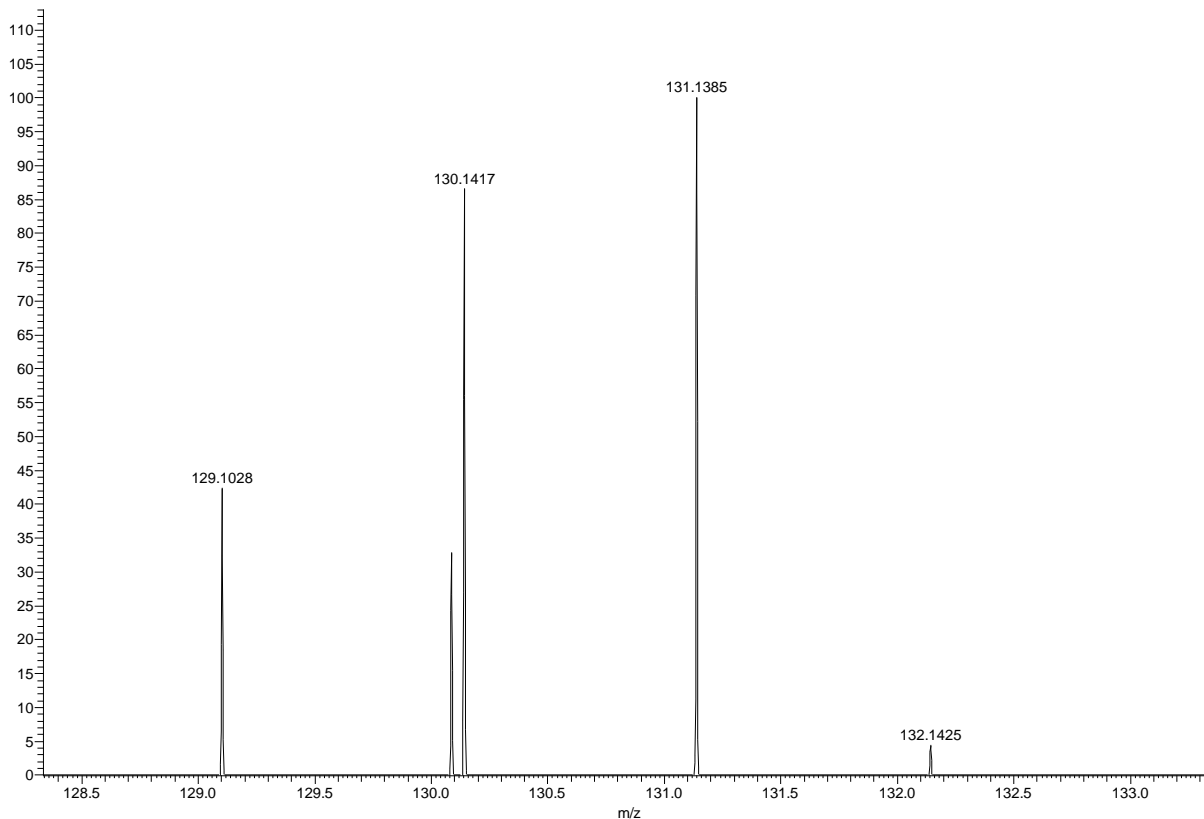

MS/MS Fragmentation of **QDHAANPCGQIGETVDLDEAVQR**

Found in **PPB\_ECOLI**, Alkaline phosphatase OS=Escherichia coli (strain K12) GN=phoA PE=1 SV=1

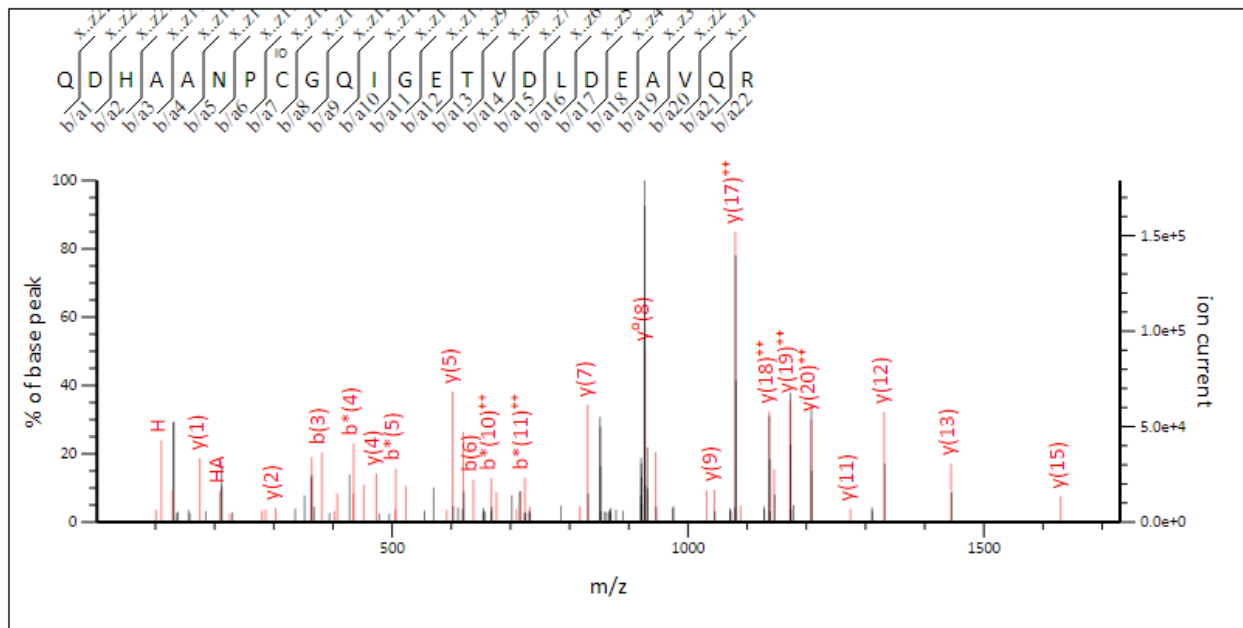

HF170126\_0111\_i\_ssh#23027 RT: 33.86 AV: 1 NL: 8.16E4  
 F: FTMS +p NSI Full ms2 699.5950@hcd28.00 [100.0000-2875.0000]

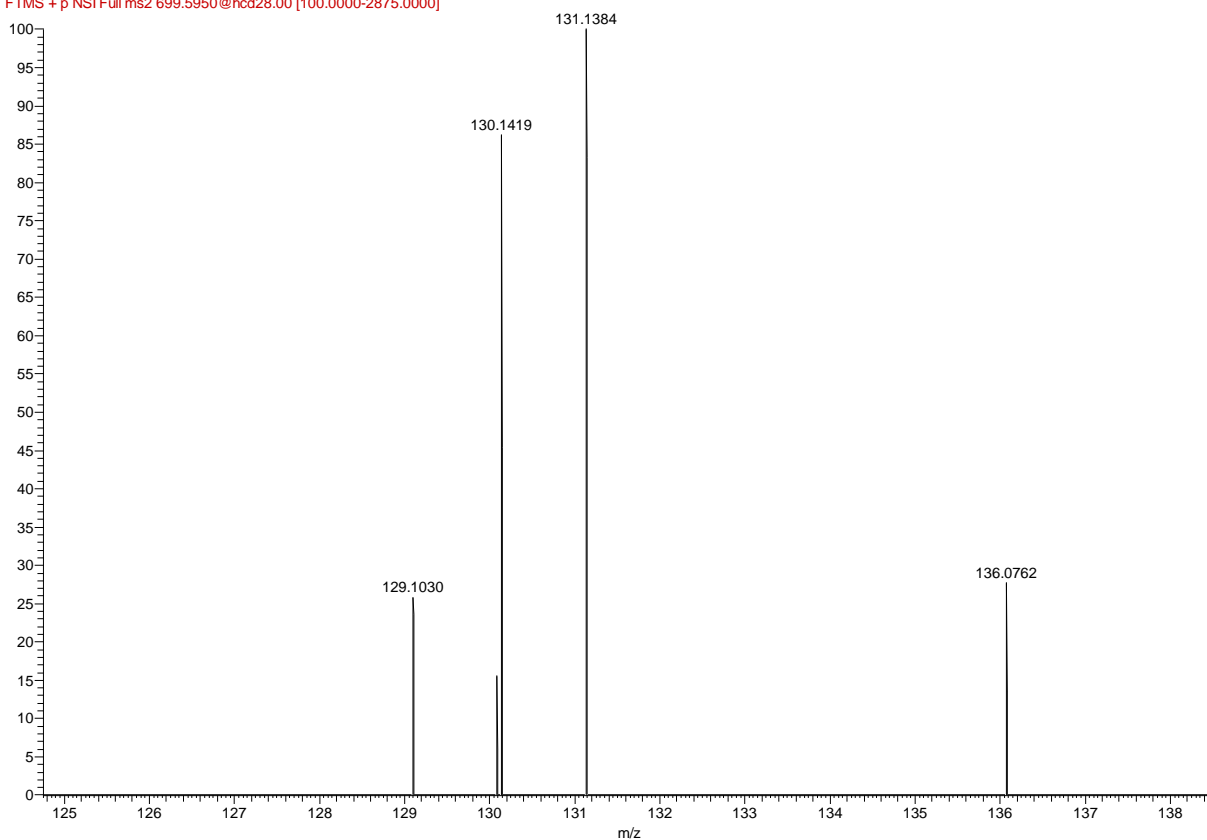

# Glyceraldehyde-3-phosphate dehydrogenase OS=Oryctolagus cuniculus GN=GAPDH PE=1 SV=3 (P46406)

MS/MS Fragmentation of **VPTPNVSVVDLTCR**

Found in **G3P\_RABIT**, Glyceraldehyde-3-phosphate dehydrogenase OS=Oryctolagus cuniculus GN=GAPDH PE=1 SV=3

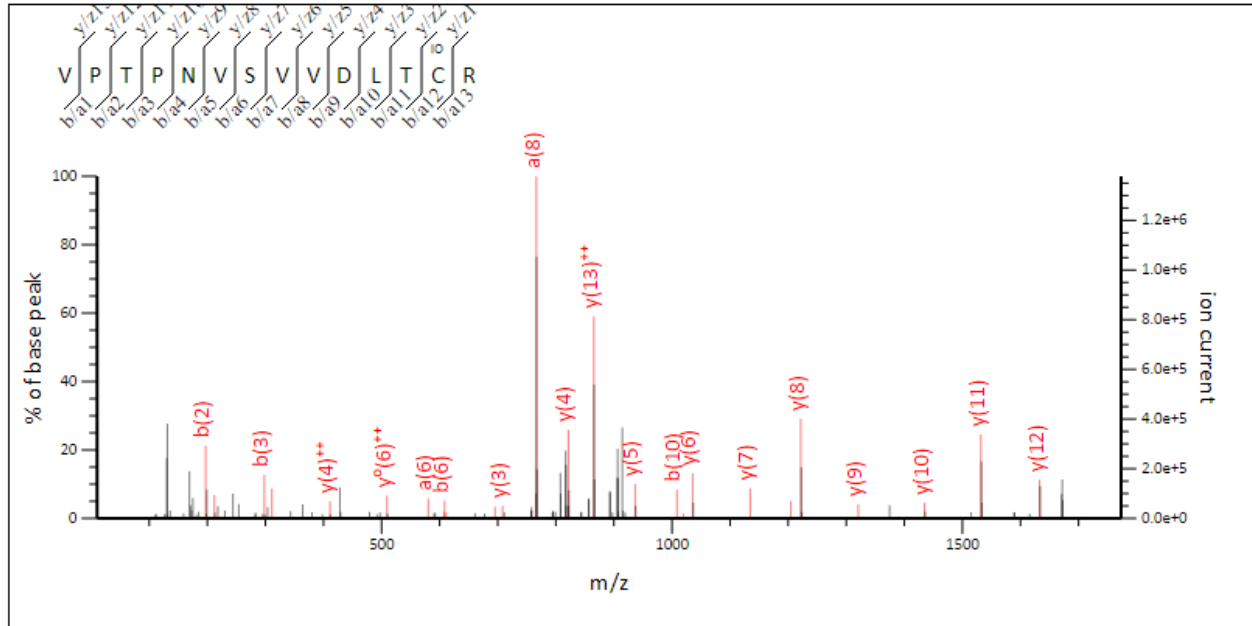

HF170126\_0111\_1\_ssh#26758 RT: 39.07 AV: 1 NL: 3.11E5  
 F: FTMS + p NSI Full ms2 915.0112@hcd28.00 [100.0000-1885.0000]

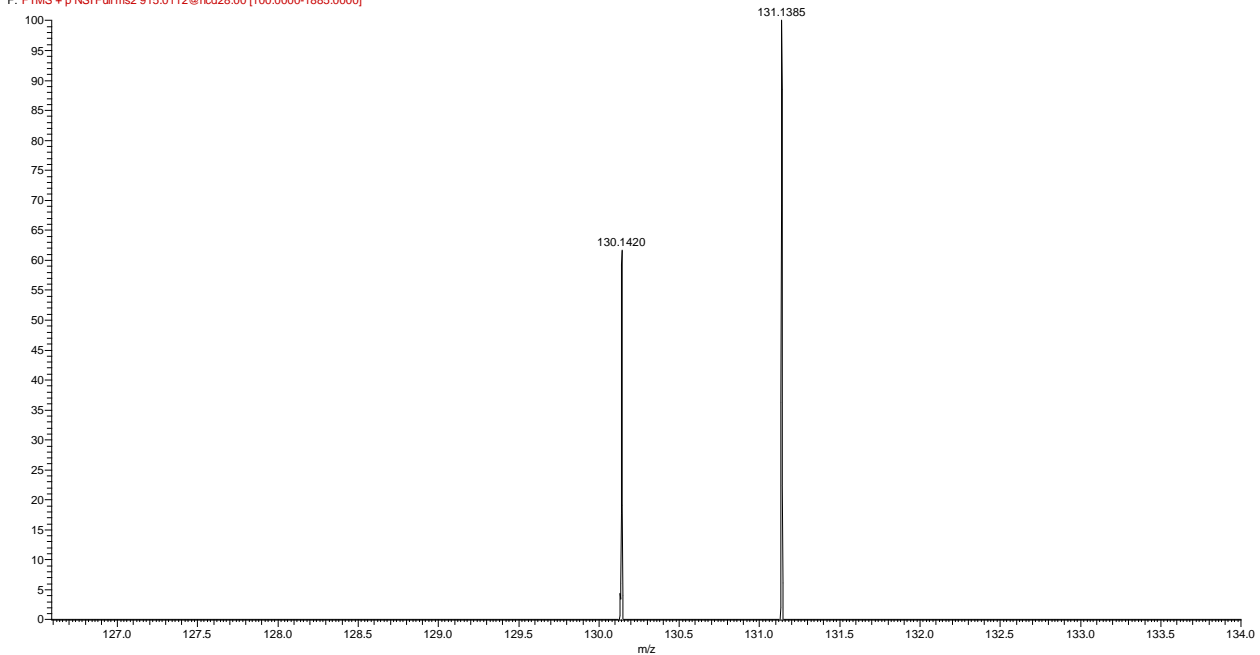

MS/MS Fragmentation of **IVSNASCTTNCLAPLAK**

Found in **G3P\_RABIT**, Glyceraldehyde-3-phosphate dehydrogenase OS=Oryctolagus cuniculus GN=GAPDH PE=1 SV=3

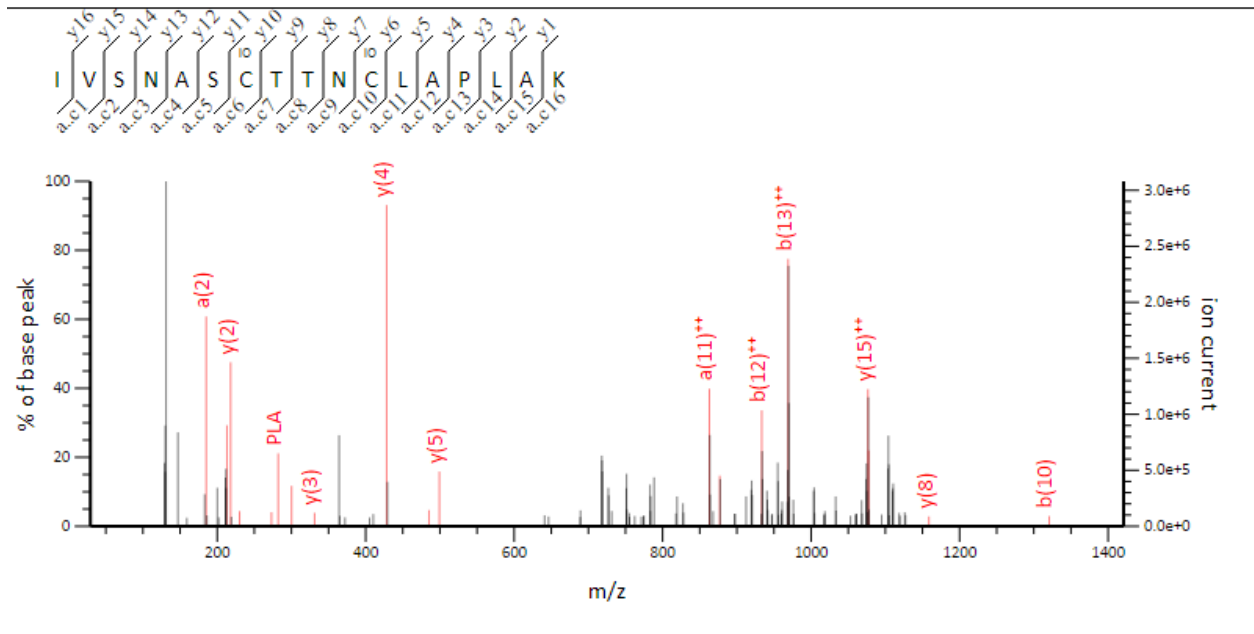

HF170126\_0112\_i\_ssh#19284 RT: 28.64 AV: 1 NL: 2.55E6  
 F: FTMS + p NSI Full ms2 788.7763@hcd28.00 [100.0000-2435.0000]

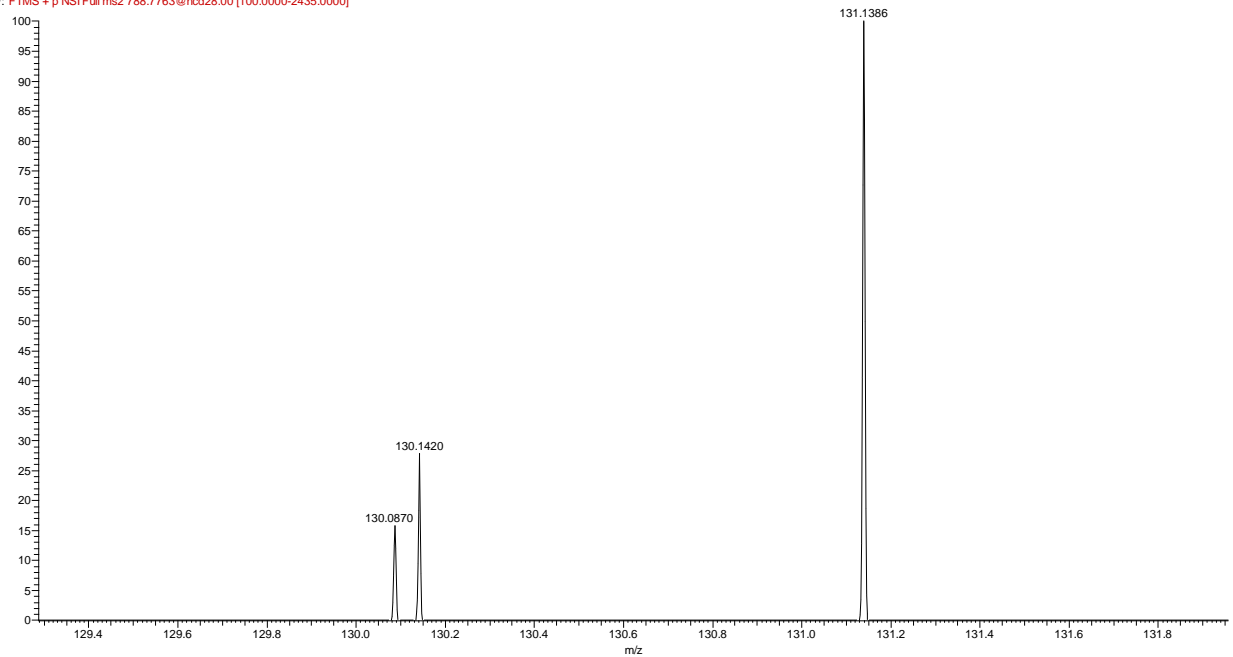

MS/MS Fragmentation of **GILGYTEDQVVSCDFNSATHSSTFDAGAGIALNDHFVK**

Found in **G3P\_RABIT**, Glyceraldehyde-3-phosphate dehydrogenase OS=Oryctolagus cuniculus GN=GAPDH PE=1 SV=3

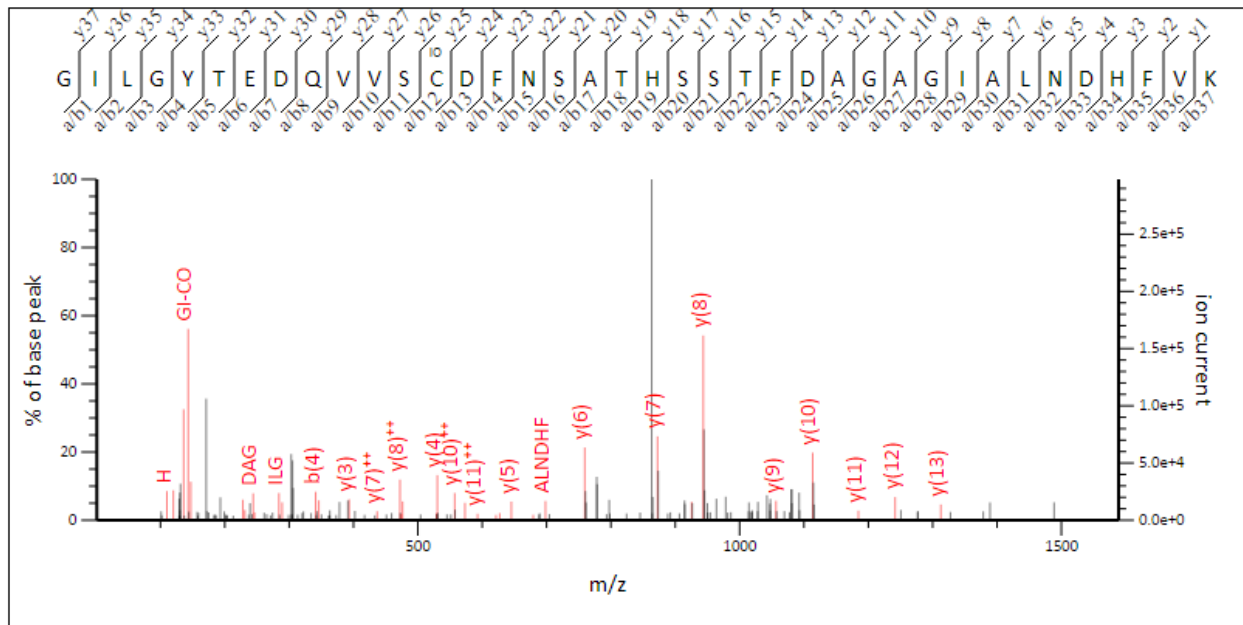

HF170126\_0111\_i\_ssh#32810 RT: 47.36 AV: 1 NL: 2.60E4  
 F: FTMS + p NSI Full ms2.864.0100@hcd28.00 [100.0000-4430.0000]

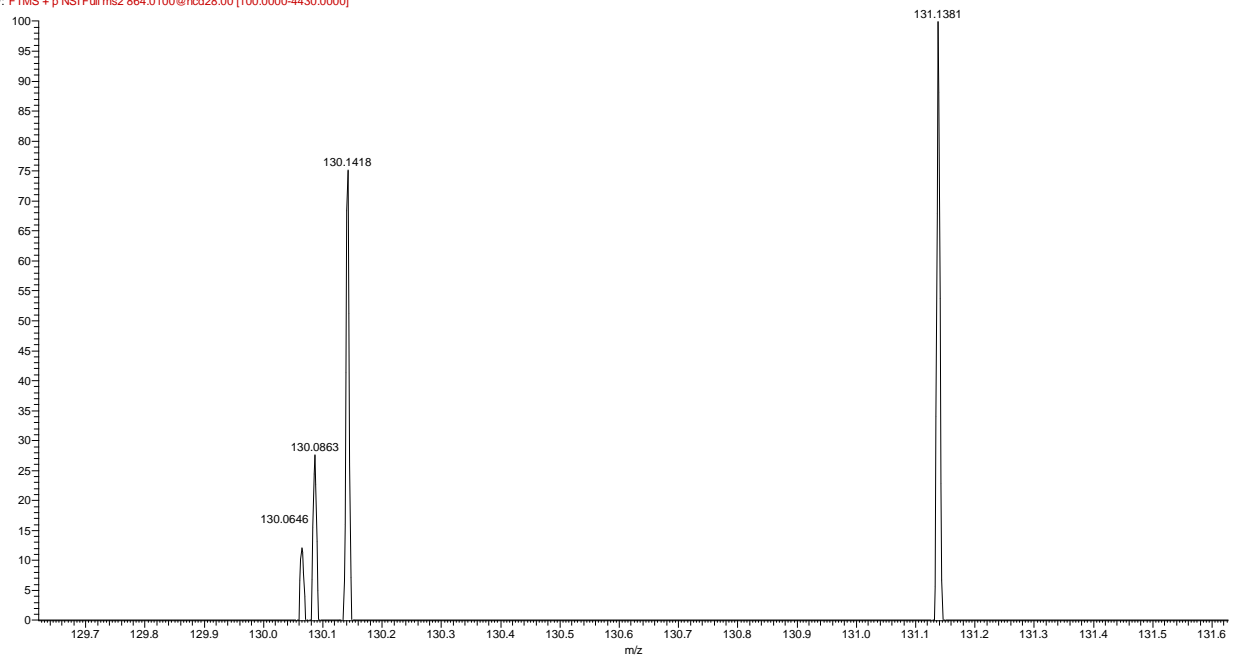

## Non-reducing SDS-PAGE analysis results

|          |            |
|----------|------------|
| catalase |            |
| red      | 68.1846327 |
| ox       | 31.8153673 |

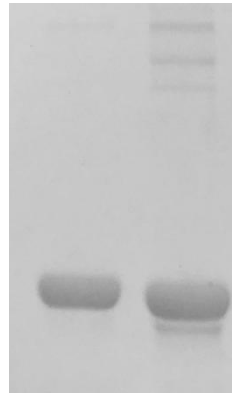

|                      |            |
|----------------------|------------|
| Alkaline Phosphatase |            |
| red                  | 92.3963134 |
| ox                   | 7.60368664 |

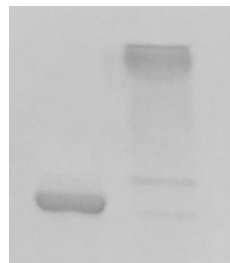

|                                          |           |
|------------------------------------------|-----------|
| Glyceraldehyde-3-phosphate dehydrogenase |           |
| red                                      | 45.621192 |
| rox                                      | 54.378808 |

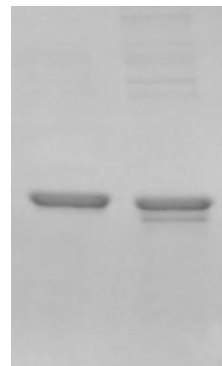



## ESM S2

**Table S1** Significant changes in protein expression profile after H<sub>2</sub>O<sub>2</sub> treatment

| Protein name                                                                                                                                 | Protein | Gene name | Expression profile | CV(%) | Significance A |
|----------------------------------------------------------------------------------------------------------------------------------------------|---------|-----------|--------------------|-------|----------------|
| RNA polymerase-binding transcription factor DksA                                                                                             | P0ABS1  | dksA      | 1.93               | 4.4   | 8.85E-05       |
| Formate dehydrogenase-O iron-sulfur subunit                                                                                                  | P0AAJ5  | fdoH      | 1.78               | 6.6   | 2.18E-03       |
| Fumarate reductase iron-sulfur subunit                                                                                                       | P0AC47  | frdB      | 2.01               | 2.4   | 1.26E-05       |
| Ferric uptake regulation protein                                                                                                             | P0A9A9  | fur       | 1.85               | 4.4   | 4.79E-04       |
| Galactokinase                                                                                                                                | P0A6T3  | galK      | 1.63               | 8.1   | 3.20E-02       |
| Glutaredoxin-2                                                                                                                               | P0AC59  | grxB      | 1.84               | 0.3   | 6.95E-04       |
| Glutaredoxin-3                                                                                                                               | P0AC62  | grxC      | 2.10               | 5.9   | 1.36E-06       |
| Histidinol-phosphate aminotransferase                                                                                                        | P06986  | hisC      | 1.65               | 2.4   | 2.44E-02       |
| Hydrogenase-2 operon protein HybA                                                                                                            | P0AAJ8  | hybA      | 2.28               | 0.7   | 1.27E-08       |
| HTH-type transcriptional regulator IseR                                                                                                      | P0AGK8  | iseR      | 1.66               | 2.8   | 2.03E-02       |
| Peptide methionine sulfoxide reductase MsrB                                                                                                  | P0A746  | msrB      | 1.68               | 8.7   | 1.41E-02       |
| NADH-quinone oxidoreductase subunit F                                                                                                        | P31979  | nuoF      | 1.82               | 29.4  | 9.51E-04       |
| NAD-dependent dihydropyrimidine dehydrogenase subunit PreT                                                                                   | P76440  | preT      | 1.67               | 2.1   | 1.79E-02       |
| Phosphoribosylamine--glycine ligase                                                                                                          | P15640  | purD      | 1.68               | 5.4   | 1.40E-02       |
| D-ribose pyranase                                                                                                                            | P04982  | rbsD      | 1.61               | 3.3   | 4.64E-02       |
| Riboflavin biosynthesis protein RibD;Diaminohydroxyphosphoribosylaminopyrimidine deaminase;5-amino-6-(5-phosphoribosylamino)uracil reductase | P25539  | ribD      | 1.74               | 2.2   | 5.24E-03       |
| 50S ribosomal protein L31                                                                                                                    | P0A7M9  | rpmE      | 2.02               | 11.9  | 1.01E-05       |
| 50S ribosomal protein L36                                                                                                                    | P0A7Q6  | rpmJ      | 1.85               | 4.3   | 5.47E-04       |
| Putative ribosome biogenesis GTPase RsgA                                                                                                     | P39286  | rsgA      | 1.62               | 6.5   | 3.83E-02       |
| Polyamine aminopropyl transferase                                                                                                            | P09158  | speE      | 1.64               | 10.2  | 3.11E-02       |
| Periplasmic trehalase                                                                                                                        | P13482  | treA      | 1.62               | 2.2   | 3.98E-02       |
| Thioredoxin-1                                                                                                                                | P0AA25  | trxA      | 1.64               | 5.5   | 3.02E-02       |
| Thioredoxin-2                                                                                                                                | P0AGG4  | trxC      | 1.84               | 6.7   | 6.47E-04       |
| Uncharacterized protein YbeL                                                                                                                 | P0AAT9  | ybeL      | 1.73               | 12.7  | 6.25E-03       |
| Uncharacterized protein YrdD                                                                                                                 | P45771  | yrdD      | 1.67               | 20.6  | 1.85E-02       |

**Table S2** Significantly changed oxidized cysteine fractions in H<sub>2</sub>O<sub>2</sub> treated cells. (1)Raw Ox ratio = iodoTMT2/iodoTMT1 (2)Expression profile = iodoTMT4/iodoTMT3 (3)Normalized Ox ratio = oxidized fraction after H<sub>2</sub>O<sub>2</sub> treatment (iodoTMT2/iodoTMT4)/oxidized fraction in control (iodoTMT1/iodoTMT3)

| Sequence                       | Proteins | Gene names | Protein names                                          | Control |       | H <sub>2</sub> O <sub>2</sub> |       | Raw Ox ratio (1) | Expression profile (2) | Norm Ox ratio (3) | Norm Ox ratio Significance A p-value |
|--------------------------------|----------|------------|--------------------------------------------------------|---------|-------|-------------------------------|-------|------------------|------------------------|-------------------|--------------------------------------|
|                                |          |            |                                                        | %Ox     | CV(%) | %Ox                           | CV(%) |                  |                        |                   |                                      |
| VGDGTQDNLGCEK                  | P00963   | asnA       | Aspartate--ammonia ligase                              | 12.29   | 5.72  | 5.29                          | 5.56  | 0.57             | 1.32                   | 0.43              | 3.5E-02                              |
| TLEGWGYDYYVFDKVVSPVSTMMACPDGKK | P23827   | eco        | Ecotin                                                 | 20.73   | 9.51  | 8.76                          | 7.52  | 0.58             | 1.37                   | 0.42              | 2.8E-02                              |
| LIDVTTICIGCK                   | P0AAJ5   | fdoH       | Formate dehydrogenase-O iron-sulfur subunit            | 32.55   | 14.06 | 14.25                         | 9.93  | 0.78             | 1.78                   | 0.44              | 4.3E-02                              |
| MAQLNSQNGVWSCTFVGYCSEVCPK      | P0AC47   | frdB       | Fumarate reductase iron-sulfur subunit                 | 7.97    | 14.18 | 3.10                          | 10.04 | 0.8              | 2.05                   | 0.39              | 9.1E-03                              |
| SQQVTDACK                      | P0AC33   | fumA       | Fumarate hydratase class I, aerobic                    | 34.91   | 5.31  | 9.98                          | 11.83 | 0.43             | 1.49                   | 0.29              | 3.4E-05                              |
| DKGLILLSCGPYYNVLK              | P22256   | gabT       | 4-aminobutyrate aminotransferase GabT                  | 25.81   | 4.88  | 9.81                          | 28.07 | 0.53             | 1.42                   | 0.38              | 6.4E-03                              |
| ECISENQILK                     | P0A9C0   | glpA       | Anaerobic glycerol-3-phosphate dehydrogenase subunit A | 30.82   | 22.67 | 13.33                         | 2.70  | 0.58             | 1.32                   | 0.43              | 3.7E-02                              |
| SLAICTLLDKPSR                  | P0A9M2   | hpt        | Hypoxanthine phosphoribosyltransferase                 | 43.85   | 22.73 | 15.33                         | 28.53 | 0.49             | 1.25                   | 0.35              | 1.7E-03                              |
| TGIVHYDKDVC TGCR               | P0AAJ8   | hybA       | Hydrogenase-2 operon protein HybA                      | 26.32   | 2.36  | 6.61                          | 3.56  | 0.57             | 2.28                   | 0.25              | 1.7E-06                              |
| VLVCVPVGATQVERR                | P0A9X4   | mreB       | Rod shape-determining protein MreB                     | 20.12   | 20.25 | 8.02                          | 13.25 | 0.59             | 1.41                   | 0.4               | 1.3E-02                              |
| KHSICPSGKR                     | P0A9L5   | ppiC       | Peptidyl-prolyl cis-trans isomerase C                  | 29.28   | 3.75  | 12.91                         | 5.47  | 0.63             | 1.43                   | 0.44              | 4.6E-02                              |
| CHPFFT GK                      | P0A7M9   | rpmE       | 50S ribosomal protein L31                              | 10.08   | 15.76 | 4.02                          | 14.32 | 0.91             | 2.29                   | 0.4               | 1.3E-02                              |
| GEDVVVPLFAVGEIACVSVHGANKR      | P0AC41   | sdhA       | Succinate dehydrogenase flavoprotein subunit           | 16.85   | 13.28 | 7.18                          | 20.62 | 0.56             | 1.32                   | 0.43              | 3.1E-02                              |
| DDLPPVIDFWAPWCGPCR             | P0AGG4   | trxC       | Thioredoxin-2                                          | 15.33   | 7.85  | 6.37                          | 16.49 | 0.76             | 1.84                   | 0.42              | 2.2E-02                              |
| HGANLILLDISPEIEKLADEL CGR      | P37440   | ucpA       | Oxidoreductase UcpA                                    | 33.11   | 19.35 | 13.89                         | 20.89 | 0.66             | 1.51                   | 0.42              | 2.5E-02                              |
| CHFHLPIYTPEVLTLC PK            | P0AAT9   | ybeL       | Uncharacterized protein YbeL                           | 9.91    | 8.20  | 4.40                          | 15.02 | 0.84             | 1.88                   | 0.44              | 5.0E-02                              |
| AGIEAANFPFCTIEPNTGVVPM PDPR    | P0ABU2   | y chF      | Ribosome-binding ATPase YchF                           | 6.26    | 26.31 | 2.68                          | 21.48 | 0.53             | 1.21                   | 0.43              | 3.2E-02                              |
| LVIECTGMADPGPIIQTFFSHEVLCQR    | P24203   | yjiA       | Uncharacterized GTP-binding protein YjiA               | 12.72   | 15.38 | 5.54                          | 9.81  | 0.62             | 1.37                   | 0.44              | 4.1E-02                              |
